# Supplementary material
Source: PubMed Central journal article supplement (PMC5588770)

**A**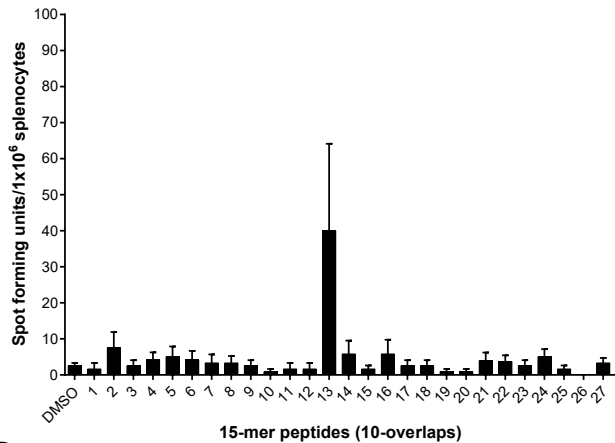**B**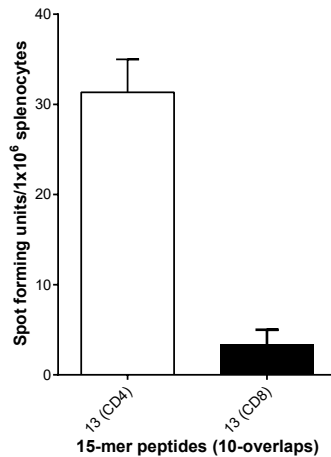**C**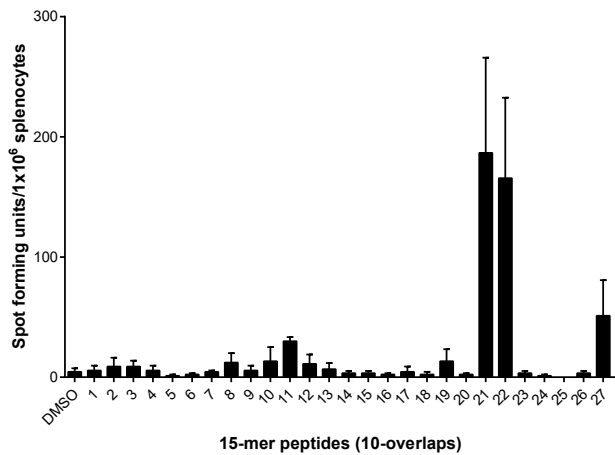**D**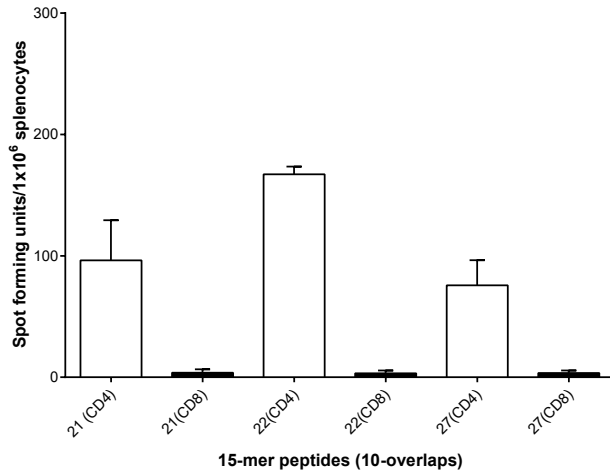

Supplement: IMM-152-344-s001.pdf [file IMM-152-344-s001.pdf]

**A**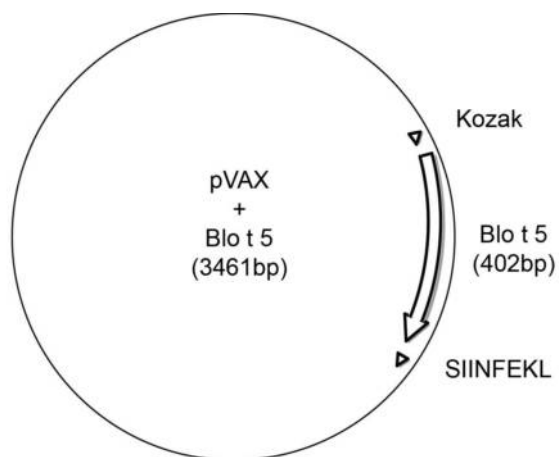**B**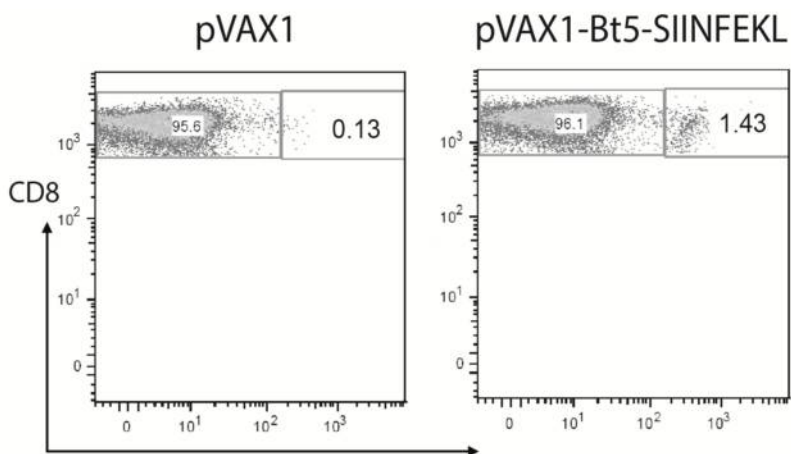**C**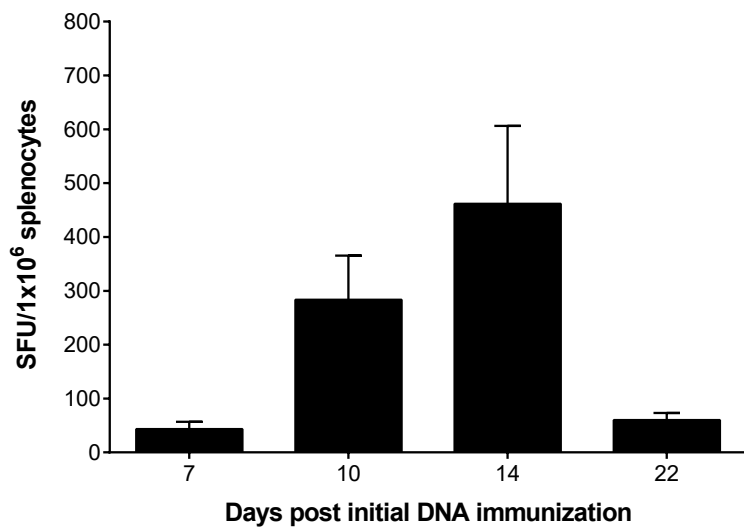

Supplement: IMM-152-344-s002.pdf [file IMM-152-344-s002.pdf]
